# Supplementary material for: Baclofen to Prevent Relapse in Gamma-Hydroxybutyrate (GHB)-Dependent Patients: A Multicentre, Open-Label, Non-Randomized, Controlled Trial
Source: PubMed Central journal article supplement — CNS Drugs. 2018 Apr 12;32(5):437–42. doi: 10.1007/s40263-018-0516-6 (PMC5976688; doi:10.1007/s40263-018-0516-6), 2018-04-12
Supplement: 40263_2018_516_MOESM1_ESM.pdf [file 40263_2018_516_MOESM1_ESM.pdf]

# Appendix I

**Baclofen Side-effect list patient**

Date:

Name:

Do you feel that this medicine helps you? Circle the answer which suits you the best.

|    |                   |            |     |
|----|-------------------|------------|-----|
| No | I do not think so | I think so | Yes |
|----|-------------------|------------|-----|

**Baclofen Side-effect list**

Give a rating on how often you have experienced following complaints:

never (0)      seldom (1)      sometimes (2)      frequently (3)      always (4)

|                                   |   |   |   |   |   |
|-----------------------------------|---|---|---|---|---|
| Drowsiness                        | 0 | 1 | 2 | 3 | 4 |
| Fatigue                           | 0 | 1 | 2 | 3 | 4 |
| Nausea                            | 0 | 1 | 2 | 3 | 4 |
| Vomiting                          | 0 | 1 | 2 | 3 | 4 |
| Light-headedness                  | 0 | 1 | 2 | 3 | 4 |
| Dizziness                         | 0 | 1 | 2 | 3 | 4 |
| Tremor                            | 0 | 1 | 2 | 3 | 4 |
| Headache                          | 0 | 1 | 2 | 3 | 4 |
| Vision dysfunction                | 0 | 1 | 2 | 3 | 4 |
| Constipation                      | 0 | 1 | 2 | 3 | 4 |
| Diarrhoea                         | 0 | 1 | 2 | 3 | 4 |
| Dry mouth                         | 0 | 1 | 2 | 3 | 4 |
| Excessive sweating                | 0 | 1 | 2 | 3 | 4 |
| Skin eruption                     | 0 | 1 | 2 | 3 | 4 |
| Urination problems                | 0 | 1 | 2 | 3 | 4 |
| Muscle pain                       | 0 | 1 | 2 | 3 | 4 |
| Muscle weakness                   | 0 | 1 | 2 | 3 | 4 |
| Euphoric feelings                 | 0 | 1 | 2 | 3 | 4 |
| Depressive feelings               | 0 | 1 | 2 | 3 | 4 |
| Hallucinations                    | 0 | 1 | 2 | 3 | 4 |
| Epileptic seizures/attacks        | 0 | 1 | 2 | 3 | 4 |
| Others (report when did it start) |   |   |   |   |   |
| -                                 | 0 | 1 | 2 | 3 | 4 |
| -                                 | 0 | 1 | 2 | 3 | 4 |
| -                                 | 0 | 1 | 2 | 3 | 4 |

Figure 1: Example of baclofen side effects list
